# Supplementary material for: Cognitive Functions, Neurotransmitter Alterations, and Hippocampal Microstructural Changes in Mice Caused by Feeding on Western Diet
Source: MDPI journal article supplement (doi:10.3390/cells12182331), 2023-09-21
Supplement: s1 [file s1]

**Supplementary Table S1.** Materials and sources.

| Materials                                          | Source                                     | Reference             |
|----------------------------------------------------|--------------------------------------------|-----------------------|
| Anti-CD31 antibody, rat                            | BD Biosciences, Heidelberg, Germany        | 550274                |
| Anti-GFAP antibody, chicken                        | Covance, Princeton, NJ, USA                | PCK-591P              |
| Anti-Iba1 antibody, goat                           | Abcam, Cambridge, UK                       | ab5076                |
| Anti-liver arginase1 antibody, rabbit              | Abcam, Cambridge, UK                       | ab203490              |
| Anti-mouse CD45 antibody, rat                      | BD Biosciences, Heidelberg, Germany        | 550539                |
| Anti-CPS1 monoclonal antibody, rabbit              | Abcam, Cambridge, UK                       | ab129076              |
| Anti-GS polyclonal antibody, rabbit                | Sigma, St. Louis, MO, USA                  | G2781                 |
| Bluing Reagent                                     | Roche, Mannheim, Germany                   | 05266769001           |
| Chromo Map DAB                                     | Roche, Mannheim, Germany                   | 05266645001           |
| Discovery OmniMap anti-rat HRP                     | Roche, Mannheim, Germany                   | 05891892001           |
| Discovery UltraMap anti-goat HRP                   | Roche, Mannheim, Germany                   | 06607241001           |
| Discovery UltraMap anti-rabbit HRP                 | Roche, Mannheim, Germany                   | 05269717001           |
| Eosin Y disodium salt                              | Sigma-Aldrich, St. Louis, MO, USA          | E4382                 |
| Hematoxylin II                                     | Roche, Mannheim, Germany                   | 05277965001           |
| Hoechst 33258                                      | Thermo Fisher Scientific, Waltham, MA, USA | H1398                 |
| Mouse IL-6 Quantikine ELISA Kit                    | R&D Systems, Minneapolis, MN, USA          | M6000B                |
| Mouse IL-10 Quantikine ELISA Kit                   | R&D Systems, Minneapolis, MN, USA          | M1000B                |
| Mouse IL-12 p40 + IL-12 p70 ELISA Kit              | Abcam, Cambridge, UK                       | ab100699              |
| Mouse TNF-alpha Quantikine ELISA Kit               | R&D Systems, Minneapolis, USA              | MTA00B                |
| Piccolo general chemistry 13                       | Hitado, Möhnesee, Germany                  | AB - 114 - 400 - 0029 |
| Picrosirius Red Stain Kit                          | Polysciences Inc., Warrington, PA, USA     | 24901                 |
| GraphPad Prism 9.5.1 Software                      | GraphPad, La Jolla, CA, USA                | RRID:SCR_002798       |
| Ethovision XT v17.5 Software                       | Noldus, Wageningen, Netherlands            | RRID:SCR_000441       |
| ActiMot2                                           | TSE systems, Chesterfield, MO, USA         | N/A                   |
| Axio Scan.Z1                                       | Zeiss, Jena, Germany                       | N/A                   |
| Arivis Vision4D 4.0 software                       | Zeiss, Jena, Germany                       | N/A                   |
| DISCOVERY ULTRA Automated Slide Preparation System | Roche, Mannheim, Germany                   | N/A                   |
| Piccolo Xpress® chemistry analyzer                 | Abaxis, Union City, CA, USA                | N/A                   |

|                                     |                                        |             |
|-------------------------------------|----------------------------------------|-------------|
| Celldiscoverer 7                    | Zeiss, Jena, Germany                   | N/A         |
| PocketChem BA PA-4140 ammonia meter | Arkray, Inc., Amstelveen, Netherlands  | N/A         |
| Ssniff R/M-H, 10 mm standard diet   | Ssniff, Soest, Germany                 | V1534 - 000 |
| Western diet                        | Research Diets, New Brunswick, NJ, USA | D16022301   |

**Supplementary Table S2.** Ingredients of the Western diet (WD).

| Ingredient            | Grams         | Kcal        | %          |
|-----------------------|---------------|-------------|------------|
| Casein, 80 mesh       | 200           | 800         | 22.12      |
| L-cystine             | 3             | 12          | 0.33       |
| Maltodextrin 10       | 100           | 400         | 11.06      |
| Fructose              | 200           | 800         | 22.12      |
| Sucrose               | 96            | 384         | 10.61      |
| Cellulose (BW200)     | 50            | 0           | 5.53       |
| Soybean oil           | 25            | 225         | 2.76       |
| Primex, non-trans fat | 135           | 1215        | 14.93      |
| Lard                  | 20            | 180         | 2.21       |
| Mineral Mix S10026    | 10            | 0           | 1.11       |
| Dicalcium phosphate   | 13            | 0           | 1.44       |
| Calcium carbonate     | 5.5           | 0           | 0.61       |
| Potassium citrate     | 16.5          | 0           | 1.82       |
| Vitamin Mix (V10001)  | 10            | 40          | 1.11       |
| Choline bitartrate    | 2             | 0           | 0.22       |
| Cholesterol           | 18            | 0           | 1.99       |
| FD&C Yellow dye       | 0.05          | 0           | 0.006      |
| <b>Total</b>          | <b>904.05</b> | <b>4056</b> | <b>100</b> |

**Supplementary Table S3.** Used antibodies and their concentrations.

| Primary antibody                      |          | Secondary antibody        |          |
|---------------------------------------|----------|---------------------------|----------|
| Antibody                              | Dilution | Antibody                  | Dilution |
| Anti-liver arginase1 antibody, rabbit | 1:2000   | Ultra-Map anti-rabbit HRP | -        |

|                                          |         |                                   |       |
|------------------------------------------|---------|-----------------------------------|-------|
| Anti-mouse CD45<br>antibody, rat         | 1:400   | Omni-Map anti-rat<br>HRP          | -     |
| Anti-CPS1 monoclonal<br>antibody, rabbit | 1:200   | Ultra-Map anti-rabbit<br>HRP      | -     |
| Anti-GS polyclonal<br>antibody, rabbit   | 1:15000 | Ultra-Map anti-rabbit<br>HRP      | -     |
| Anti-serotonin antibody,<br>goat         | 1:1000  | Ultra-Map anti-goat<br>HRP        | -     |
| Anti-Iba1 antibody, goat                 | 1:100   | Cy5 donkey anti-goat<br>IgG (H+L) | 1:200 |
| Anti-GFAP antibody,<br>chicken           | 1:2000  | Cy2 donkey anti-<br>Chicken       | 1:200 |
| Anti-CD31 antibody, rat                  | 1:50    | Cy2 donkey anti-rat<br>IgG (H+L)  | 1:200 |
| Hoechst 33258                            | 1:5000  |                                   |       |
